# Supplementary material for: The role of NF-κB and miRNA in oral cancer and cancer stem cells with or without HPV16 infection
Source: PubMed Central journal article supplement (PMC6205583; doi:10.1371/journal.pone.0205518), 2018-10-29

## (i) FACS analysis data of UD SCC-2 (HPV16+ve)

### (a) With verapamil

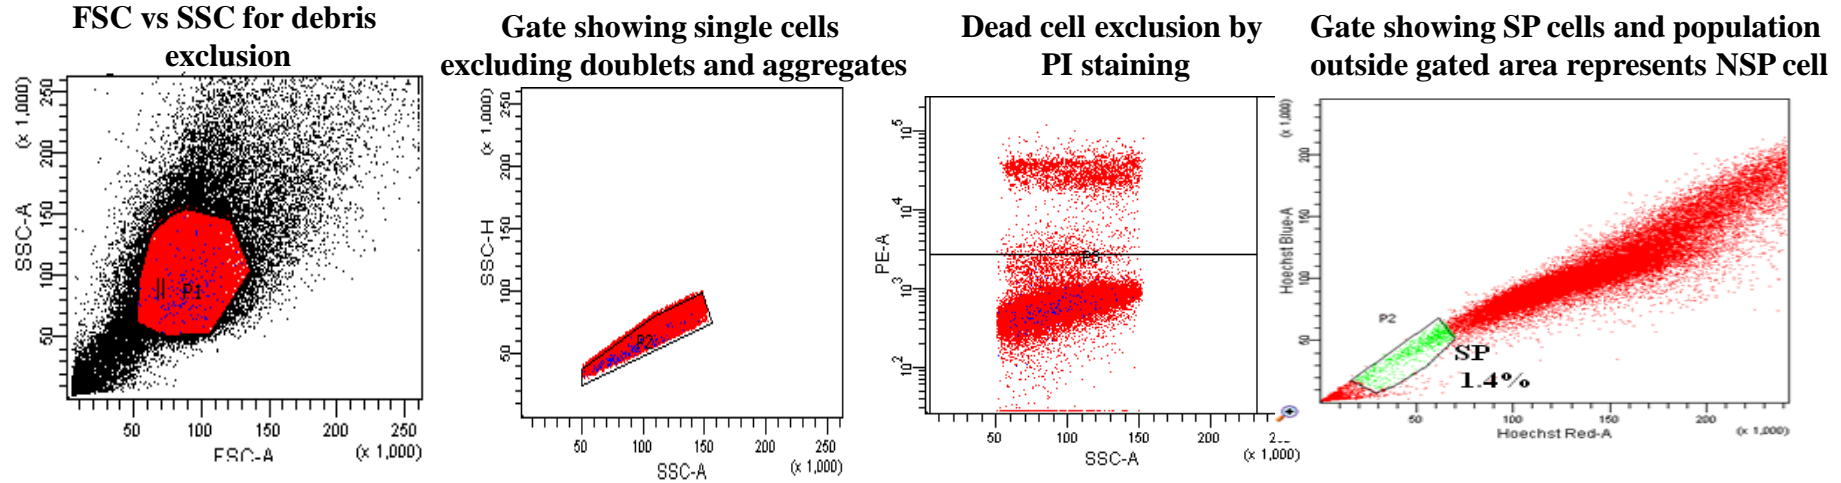

### (b) Without verapamil

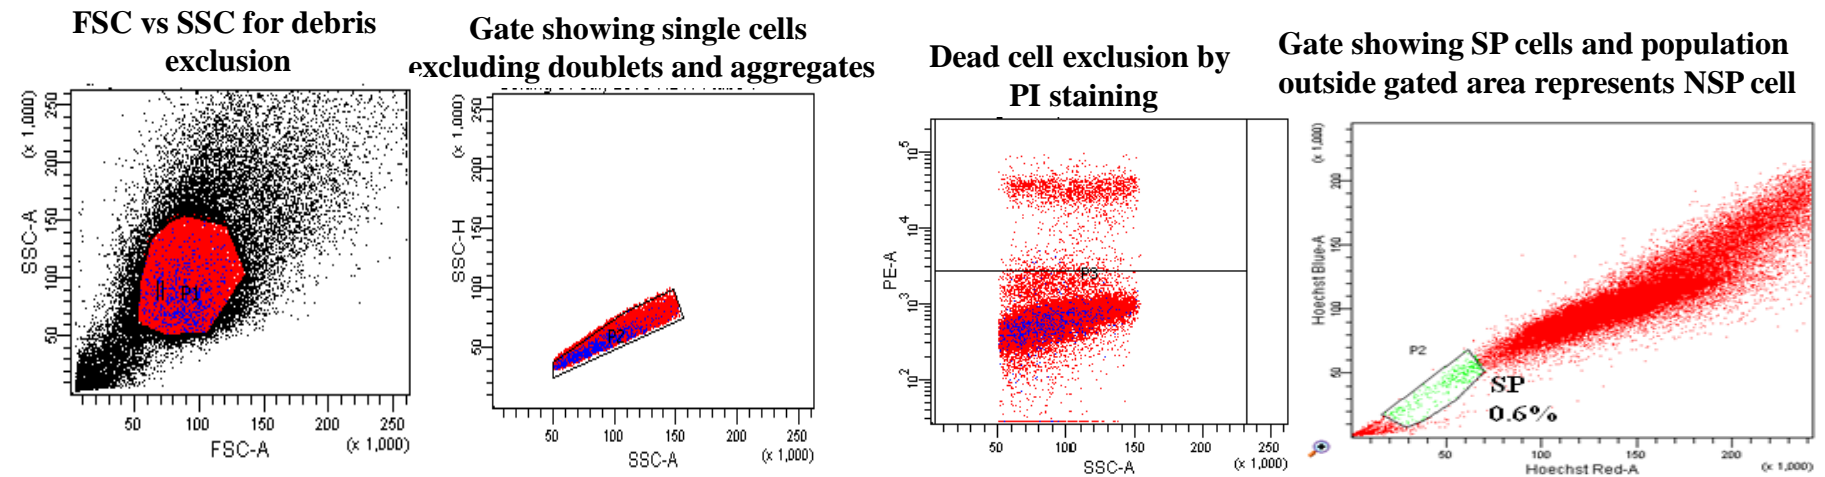

## (ii) FACS analysis data of UPCI:SCC131 (HPV-ve)

### (a) With verapamil

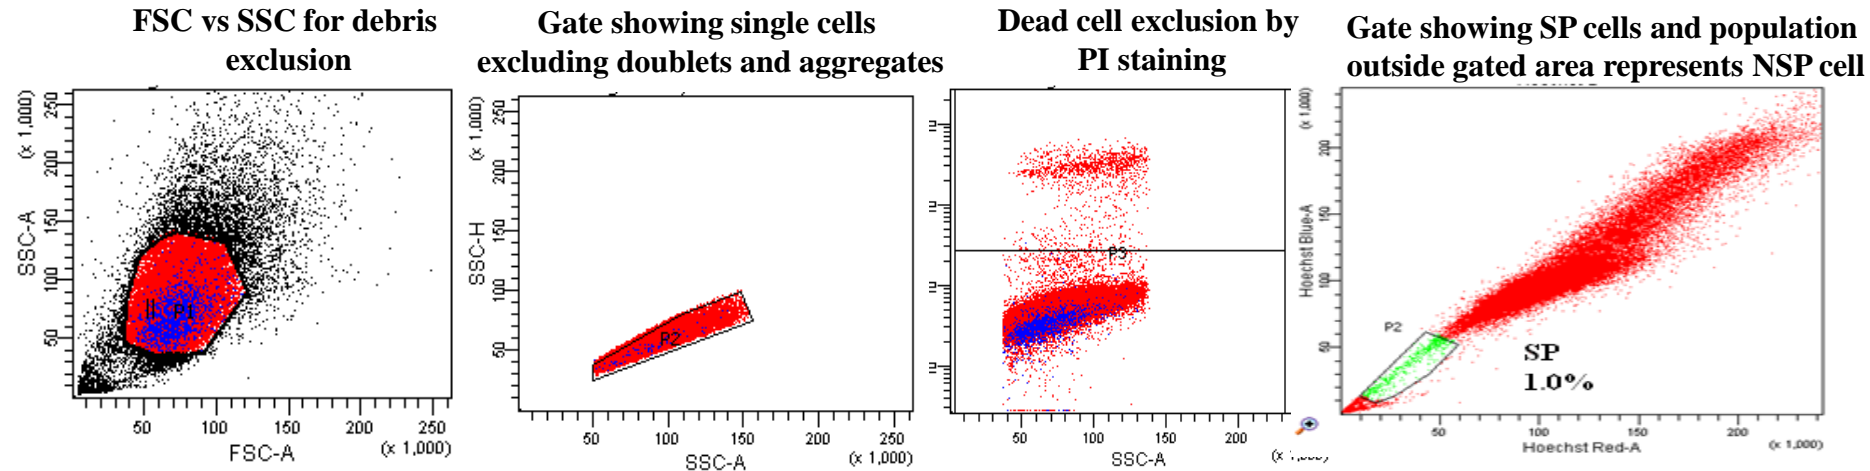

### (b) Without verapamil

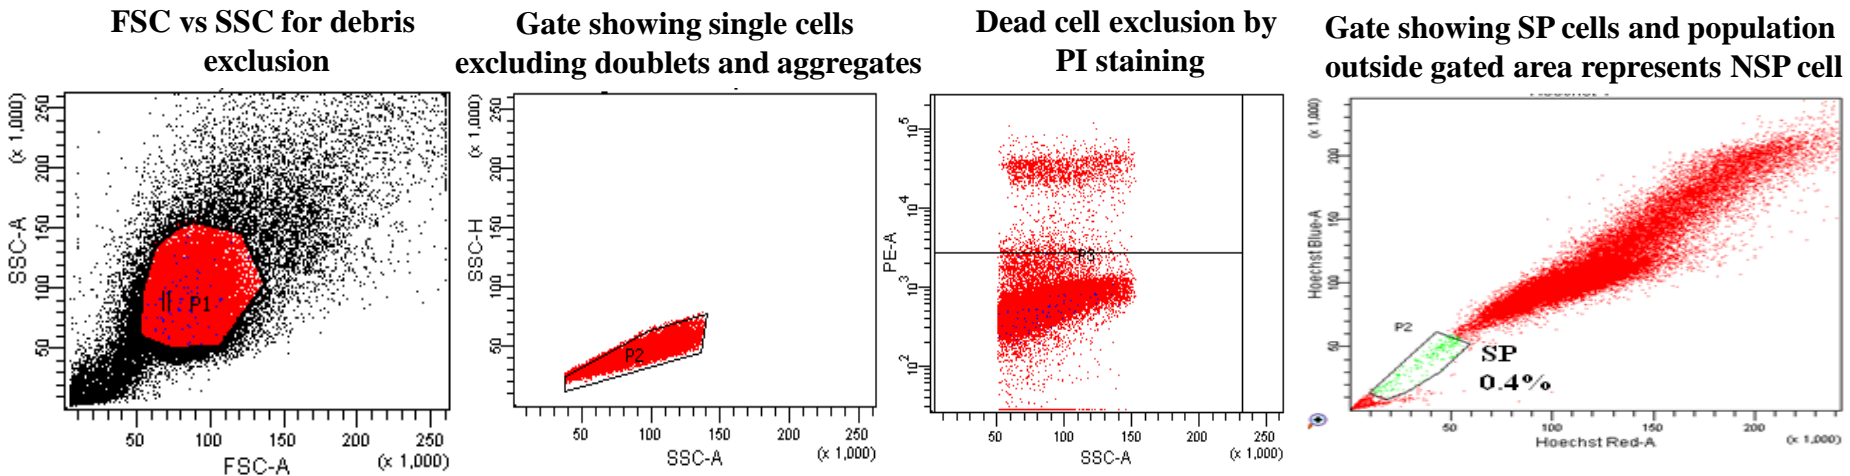

### (iii) FACS analysis data of UPCI:SCC084 (HPV-ve)

#### (a) With verapamil

FSC vs SSC for debris exclusion

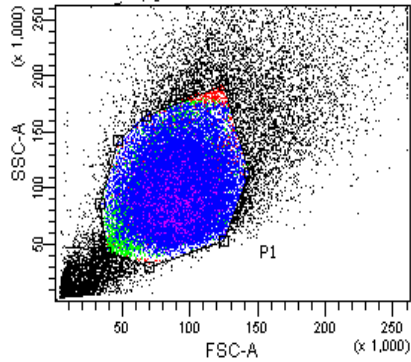

Gate showing single cells excluding doublets and aggregates

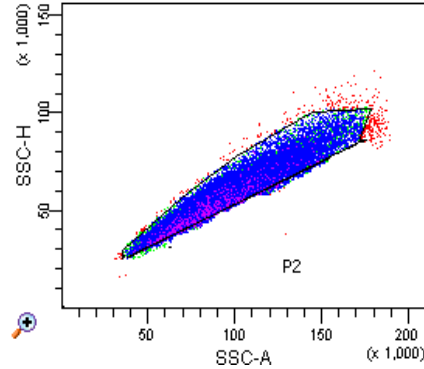

Dead cell exclusion by PI staining

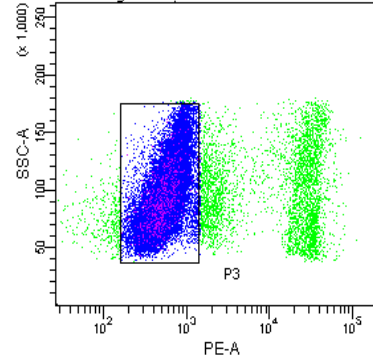

Gate showing SP cells and population outside gated area represents NSP cell

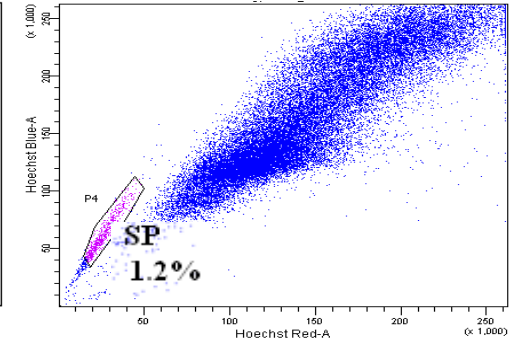

#### (b) Without verapamil

FSC vs SSC for debris exclusion

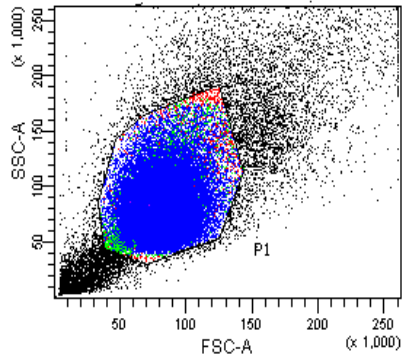

Gate showing single cells excluding doublets and aggregates

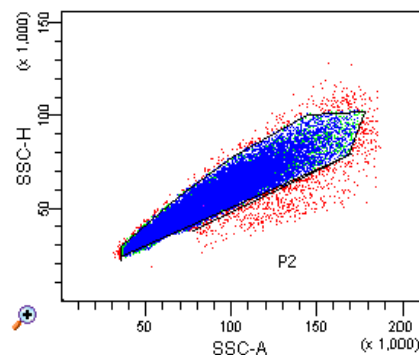

Dead cell exclusion by PI staining

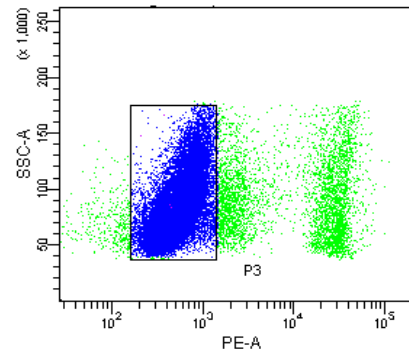

Gate showing SP cells and population outside gated area represents NSP cell

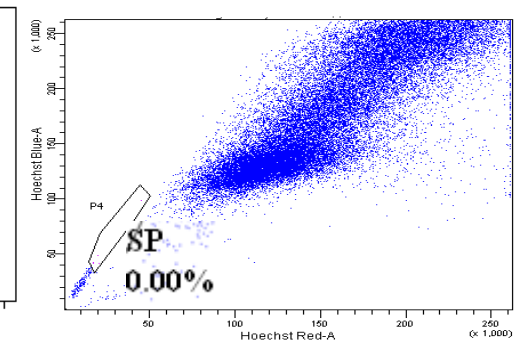

Supplement: pone.0205518.s001.pdf [file pone.0205518.s001.pdf]
