# Supplementary material for: The role of NF-κB and miRNA in oral cancer and cancer stem cells with or without HPV16 infection
Source: PubMed Central journal article supplement (PMC6205583; doi:10.1371/journal.pone.0205518), 2018-10-29

# FACS analysis data of functional characterization of SP cells present in OSCC cell lines

## 1. FACS analysis data for CD 133 in UPCI: SCC 84 (HPV-ve) cell line

### (a) For monolayer or parental population

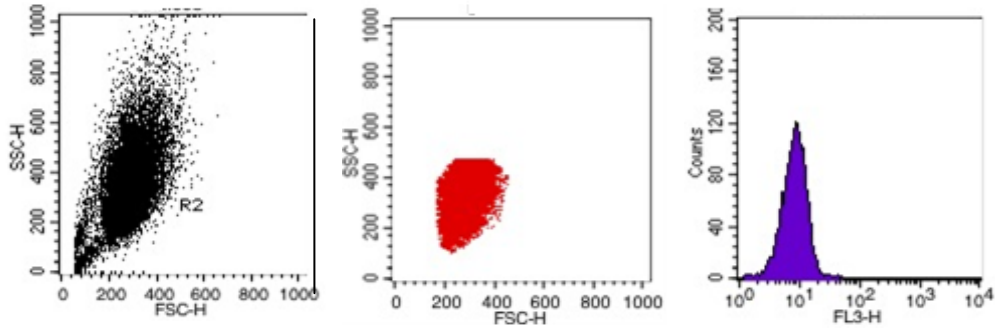

### (b) For Isotype control

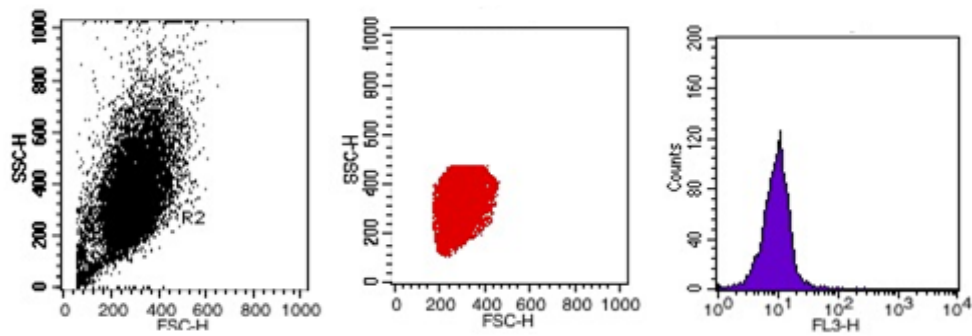

### (c) For Sphere forming SP cells

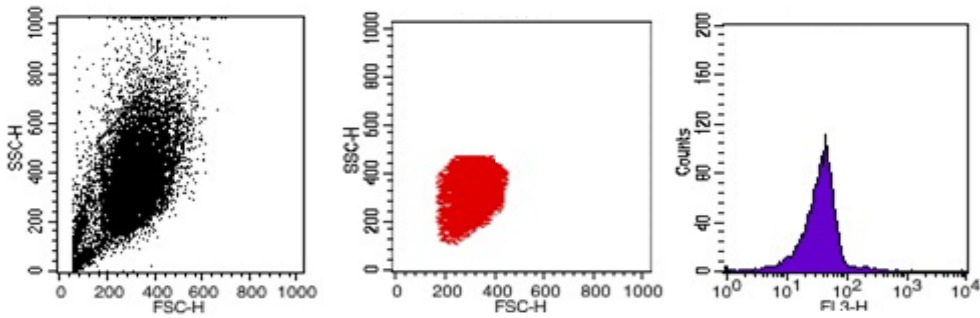

### (d) Overlay graph of parental, isotype and SP cells

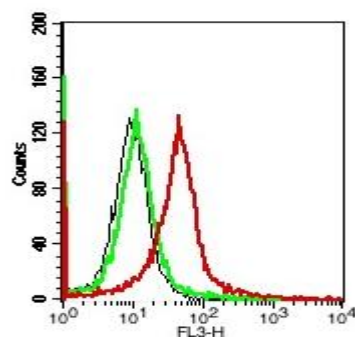

## 2. FACS analysis data for CD 133 in UPCI: SCC 131 (HPV-ve) cell line

(a) For monolayer or parental population

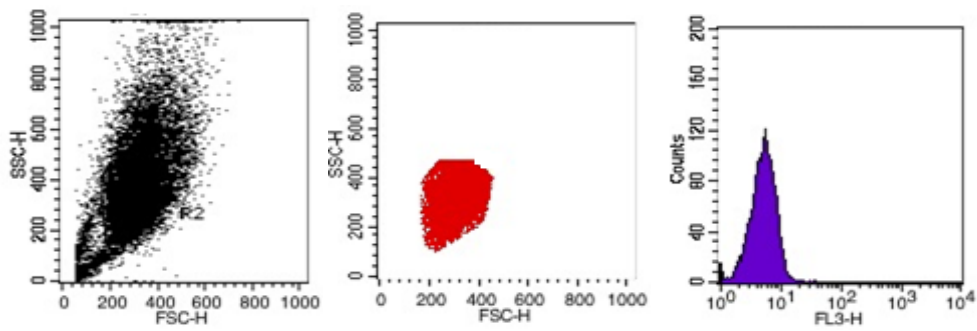

(b) For Isotype control

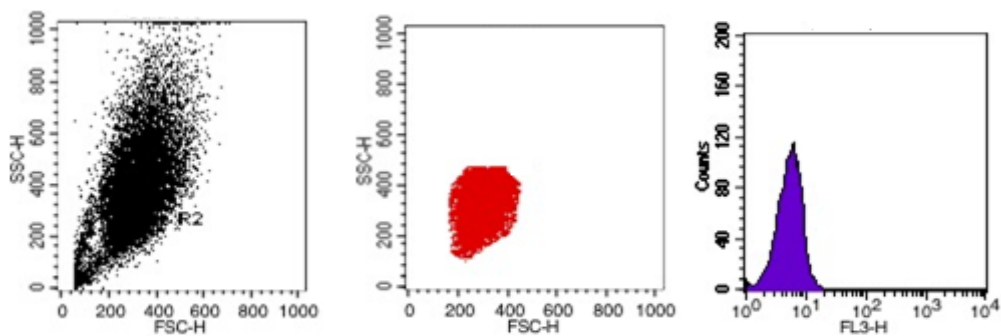

(c) For Sphere forming SP cells

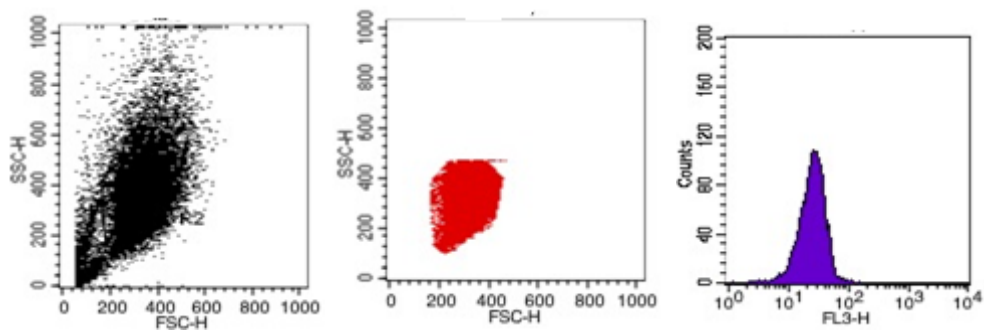

(d) Overlay graph of parental, isotype and SP cells

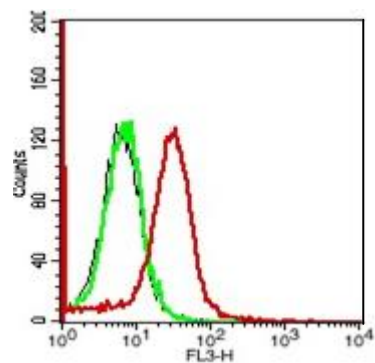

### 3. FACS analysis data for CD 133 in UD SCC-2 (HPV16+ve) cell line

(a) For monolayer or parental population

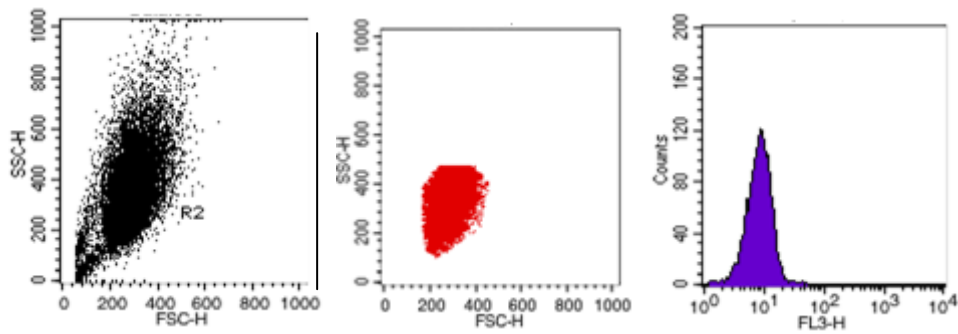

(b) For Isotype control

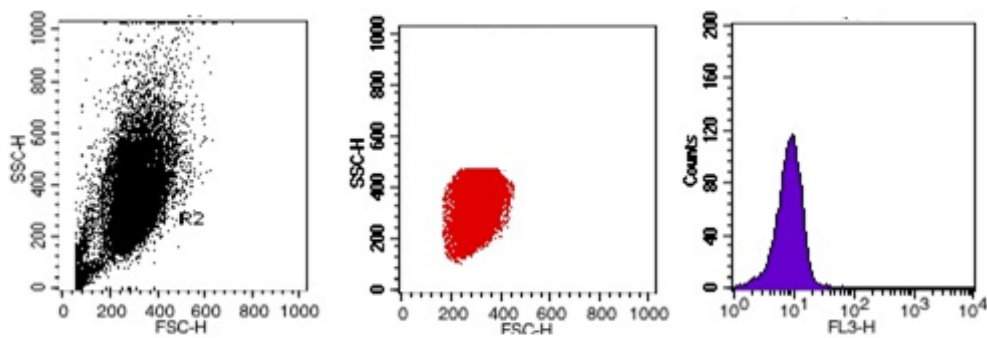

(c) For Sphere forming SP cells

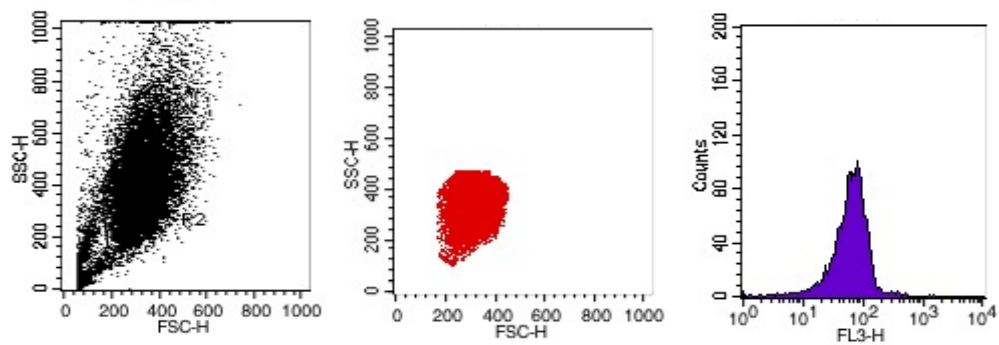

(d) Overlay graph of parental, isotype and SP cells

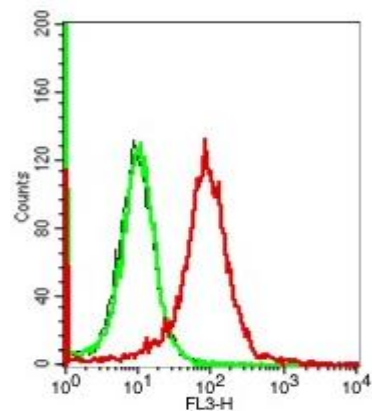

#### 4. FACS analysis data for CD117 in UPCI: SCC 84 (HPV-ve) cell line

(a) For monolayer or parental population

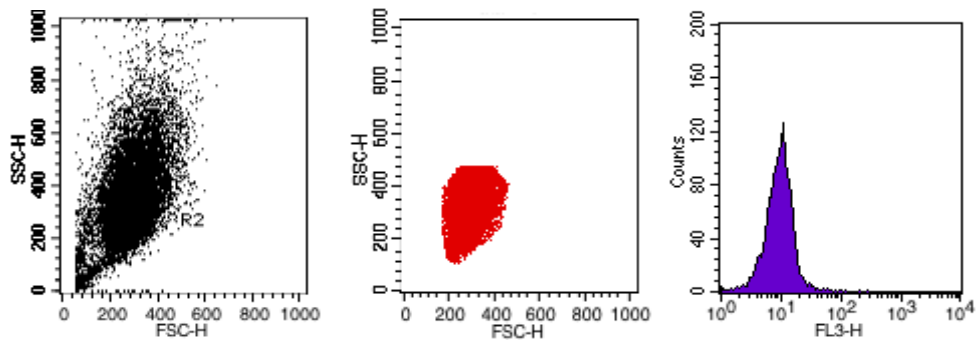

(b) For Isotype control

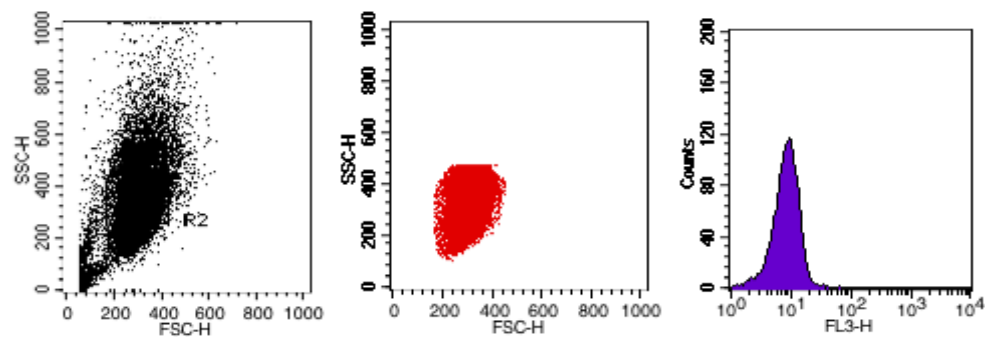

(c) For Sphere forming SP cells

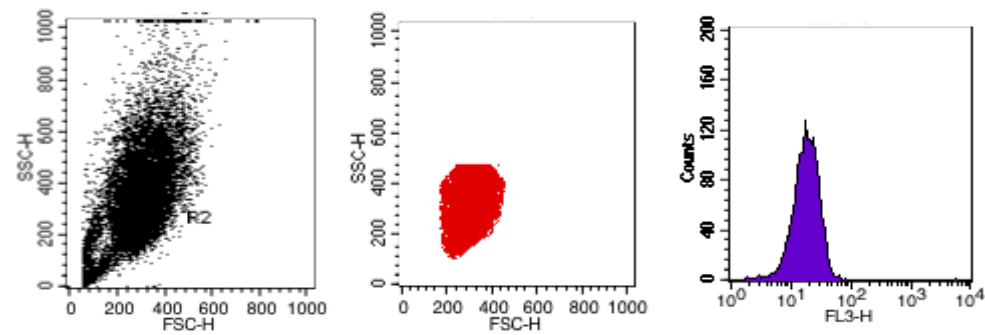

(d) Overlay graph of parental, isotype and SP cells

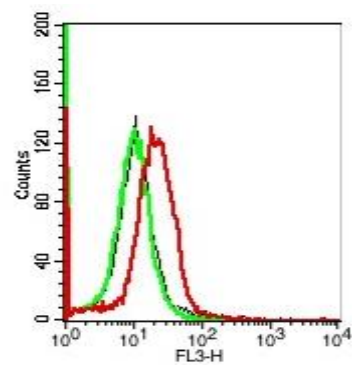

**5. FACS analysis data for CD 117 in UPCI: SCC 131 (HPV-ve) cell line**

**(a) For monolayer or parental population**

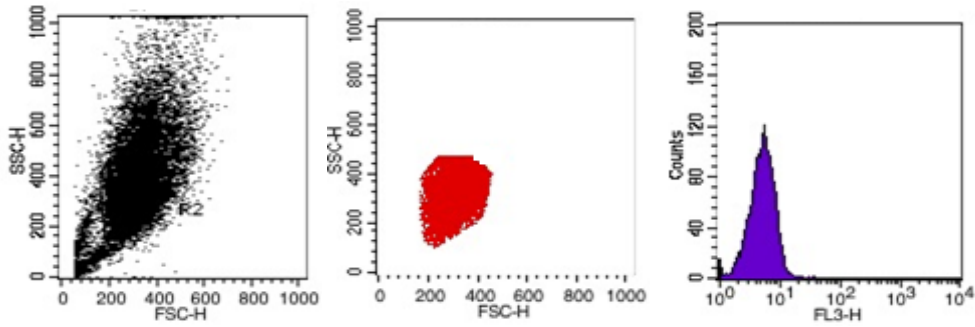

**(b) For Isotype control**

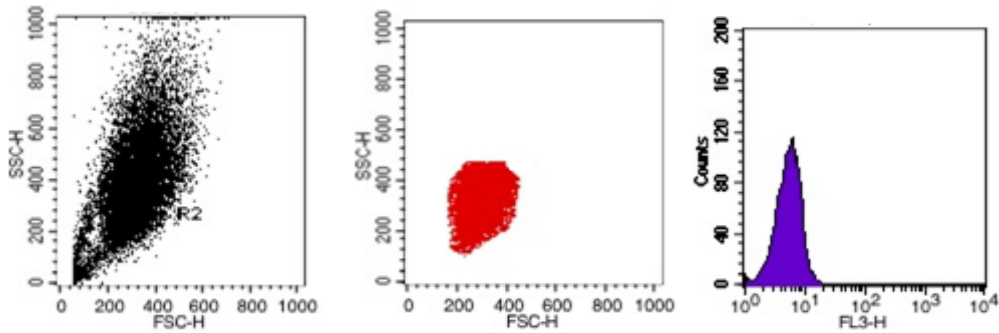

**(c) For Sphere forming SP cells**

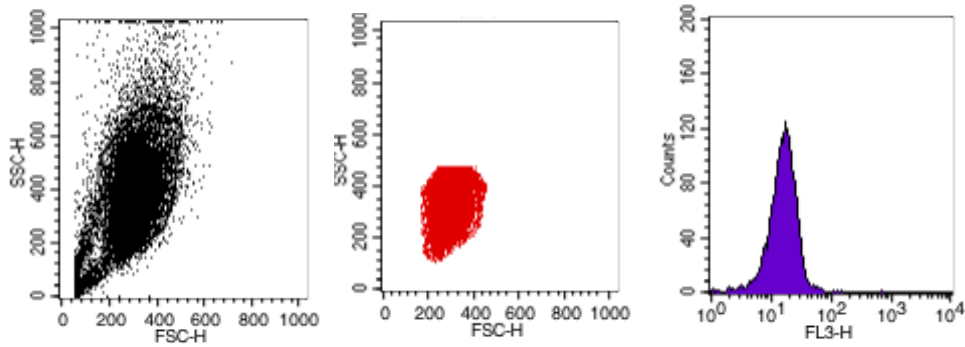

**(d) Overlay graph of parental, isotype and SP cells**

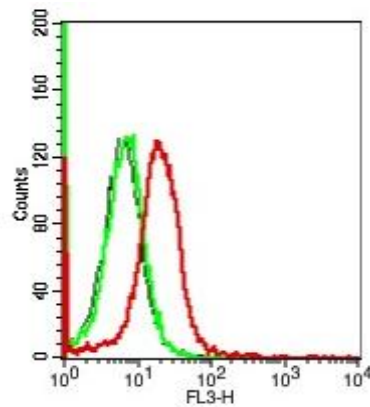

**6. FACS analysis data for CD 117 in UD SCC-2 (HPV16+ve) cell line**

**(a) For monolayer or parental population**

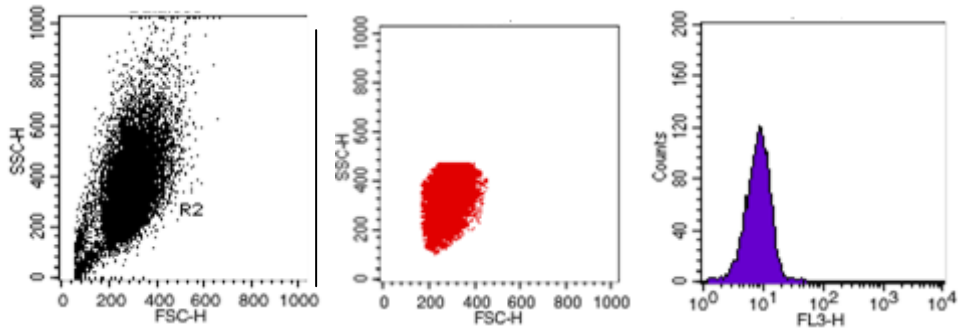

**(b) For Isotype control**

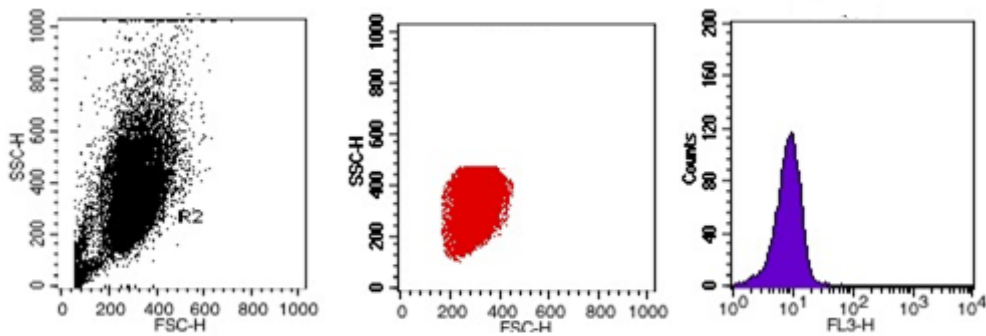

**(c) For Sphere forming SP cells**

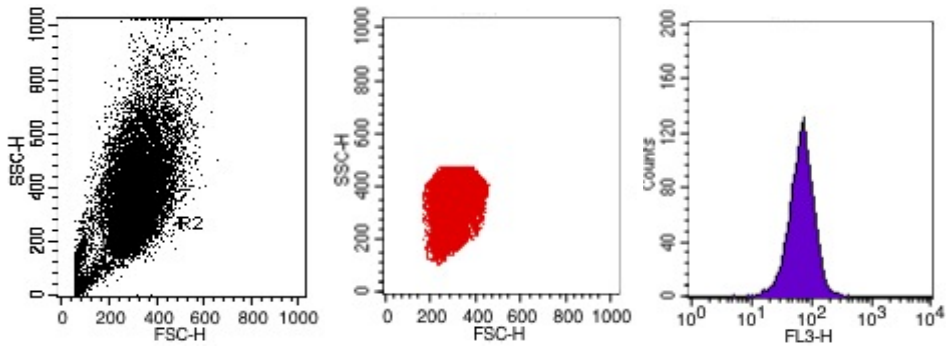

**(d) Overlay graph of parental, isotype and SP cells**

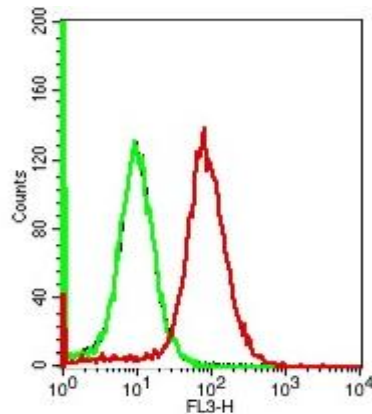

Supplement: pone.0205518.s003.pdf [file pone.0205518.s003.pdf]
